# Supplementary material
Source: MDPI journal article supplement (https://www.mdpi.com/2311-7524/10/1/46)
Supplement: s1 [file s1]

**Table S1.** Statistics of RNA-seq data of ‘CM’ and ‘CX’ peach fruit sample.

| Sample name | UMI reads | UMI mapped (%) | Multiple mapped reads (%) | Uniquely mapped reads (%) | Read-1 (%) | Read-2 (%) | Reads mapped to positive strand (%) | Reads mapped to negative strand (%) | Non-splice reads (%) | Splice reads (%) |
|-------------|-----------|----------------|---------------------------|---------------------------|------------|------------|-------------------------------------|-------------------------------------|----------------------|------------------|
| CM_CK01     | 3656584   | 34591929       | 849748                    | 33742181                  | 17120213   | 16621968   | 16877994                            | 16864187                            | 21765222             | 11976959         |
| 1           | 2         | (94.6%)        | (2.32%)                   | (92.28%)                  | (46.82%)   | (45.46%)   | (46.16%)                            | (46.12%)                            | (59.52%)             | (32.75%)         |
| CM_CK01     | 4072244   | 38426860       | 862241                    | 37564619                  | 19083882   | 18480737   | 18782288                            | 18782331                            | 24751075             | 12813544         |
| 1           | 6         | (94.36%)       | (2.12%)                   | (92.25%)                  | (46.86%)   | (45.38%)   | (46.12%)                            | (46.12%)                            | (60.78%)             | (31.47%)         |
| CM_CK01     | 3785692   | 35890976       | 837280                    | 35053696                  | 17766671   | 17287025   | 17533249                            | 17520447                            | 22883183             | 12170513         |
| 1           | 8         | (94.81%)       | (2.21%)                   | (92.6%)                   | (46.93%)   | (45.66%)   | (46.31%)                            | (46.28%)                            | (60.45%)             | (32.15%)         |
| CM_L1_1     | 3620234   | 34378875       | 699243                    | 33679632                  | 17136039   | 16543593   | 16857112                            | 16822520                            | 22297921             | 11381711         |
| 0           |           | (94.96%)       | (1.93%)                   | (93.03%)                  | (47.33%)   | (45.7%)    | (46.56%)                            | (46.47%)                            | (61.59%)             | (31.44%)         |
| CM_L1_2     | 3672248   | 34773001       | 701272                    | 34071729                  | 17309791   | 16761938   | 17035042                            | 17036687                            | 22430051             | 11641678         |
| 8           |           | (94.69%)       | (1.91%)                   | (92.78%)                  | (47.14%)   | (45.64%)   | (46.39%)                            | (46.39%)                            | (61.08%)             | (31.7%)          |
| CM_L1_3     | 5678149   | 54163134       | 1311648                   | 52851486                  | 26739740   | 26111746   | 26448626                            | 26402860                            | 34617037             | 18234449         |
| 2           |           | (95.39%)       | (2.31%)                   | (93.08%)                  | (47.09%)   | (45.99%)   | (46.58%)                            | (46.5%)                             | (60.97%)             | (32.11%)         |
| CM_L2_1     | 3741501   | 35654308       | 900668                    | 34753640                  | 17559694   | 17193946   | 17399071                            | 17354569                            | 22887590             | 11866050         |
| 0           |           | (95.29%)       | (2.41%)                   | (92.89%)                  | (46.93%)   | (45.95%)   | (46.5%)                             | (46.38%)                            | (61.17%)             | (31.71%)         |
| CM_L2_2     | 7295371   | 68368930       | 1813292                   | 66555638                  | 33916771   | 32638867   | 33317684                            | 33237954                            | 43756501             | 22799137         |
| 4           |           | (93.72%)       | (2.49%)                   | (91.23%)                  | (46.49%)   | (44.74%)   | (45.67%)                            | (45.56%)                            | (59.98%)             | (31.25%)         |
| CM_L2_3     | 3789351   | 35704728       | 866640                    | 34838088                  | 17781893   | 17056195   | 17435311                            | 17402777                            | 23347139             | 11490949         |
| 8           |           | (94.22%)       | (2.29%)                   | (91.94%)                  | (46.93%)   | (45.01%)   | (46.01%)                            | (45.93%)                            | (61.61%)             | (30.32%)         |
| CX_CK01     | 3636128   | 34456648       | 482812                    | 33973836                  | 17272135   | 16701701   | 16981278                            | 16992558                            | 22161790             | 11812046         |
| 4           |           | (94.76%)       | (1.33%)                   | (93.43%)                  | (47.5%)    | (45.93%)   | (46.7%)                             | (46.73%)                            | (60.95%)             | (32.49%)         |

|         |                                    |                    |                      |                      |                      |                      |                      |                      |                      |
|---------|------------------------------------|--------------------|----------------------|----------------------|----------------------|----------------------|----------------------|----------------------|----------------------|
| CX_CK01 | 3894731 36898576<br>0 (94.74%)     | 513110<br>(1.32%)  | 36385466<br>(93.42%) | 18453421<br>(47.38%) | 17932045<br>(46.04%) | 18190681<br>(46.71%) | 18194785<br>(46.72%) | 24019915<br>(61.67%) | 12365551<br>(31.75%) |
| CX_CK01 | 4136194 39150676<br>8 (94.65%)     | 552248<br>(1.34%)  | 38598428<br>(93.32%) | 19615537<br>(47.42%) | 18982891<br>(45.89%) | 19274951<br>(46.6%)  | 19323477<br>(46.72%) | 24969883<br>(60.37%) | 13628545<br>(32.95%) |
| CX_L1_1 | 3609403 34141551<br>4 (94.59%)     | 1644363<br>(4.56%) | 32497188<br>(90.03%) | 16500416<br>(45.72%) | 15996772<br>(44.32%) | 16299730<br>(45.16%) | 16197458<br>(44.88%) | 22141254<br>(61.34%) | 10355934<br>(28.69%) |
| CX_L1_2 | 3882781 36824603<br>6 (94.84%)     | 1748488<br>(4.5%)  | 35076115<br>(90.34%) | 17852510<br>(45.98%) | 17223605<br>(44.36%) | 17618671<br>(45.38%) | 17457444<br>(44.96%) | 23891319<br>(61.53%) | 11184796<br>(28.81%) |
| CX_L1_3 | 3939061 37421618 (95%)<br>4 (4.4%) | 1731290<br>(4.4%)  | 35690328<br>(90.61%) | 18172928<br>(46.14%) | 17517400<br>(44.47%) | 17943150<br>(45.55%) | 17747178<br>(45.05%) | 24282094<br>(61.64%) | 11408234<br>(28.96%) |
| CX_L2_1 | 3675599 34915871<br>4 (94.99%)     | 1160303<br>(3.16%) | 33755568<br>(91.84%) | 17046100<br>(46.38%) | 16709468<br>(45.46%) | 16884475<br>(45.94%) | 16871093<br>(45.9%)  | 22309410<br>(60.7%)  | 11446158<br>(31.14%) |
| CX_L2_2 | 4144059 39448579<br>8 (95.19%)     | 1369794<br>(3.31%) | 38078785<br>(91.89%) | 19279116<br>(46.52%) | 18799669<br>(45.37%) | 19052864<br>(45.98%) | 19025921<br>(45.91%) | 25095994<br>(60.56%) | 12982791<br>(31.33%) |
| CX_L2_3 | 3625715 34508976<br>2 (95.18%)     | 1189683<br>(3.28%) | 33319293<br>(91.9%)  | 16832311<br>(46.42%) | 16486982<br>(45.47%) | 16661409<br>(45.95%) | 16657884<br>(45.94%) | 21889346<br>(60.37%) | 11429947<br>(31.52%) |

Abbreviations used are as follows: CK0, immediately after harvest; L1, at the start of ethylene; L2, at the peak of ethylene release.

**Table S2.** Quality of reads obtained by RNA-seq analysis of ‘CM’ and ‘CX’ peach fruit sample.

| Sample name | Raw data (Gb) | Clean data (Gb) | Error rate (%) | Q20 (%) | Q30 (%) |
|-------------|---------------|-----------------|----------------|---------|---------|
| CM_CK01     | 7.02G         | 5.94G           | 0.03           | 98.05   | 94.07   |
| CM_CK01     | 7.91G         | 6.64G           | 0.03           | 97.88   | 93.72   |
| CM_CK01     | 7.12G         | 6.13G           | 0.03           | 97.90   | 93.73   |

|         |        |        |      |       |       |
|---------|--------|--------|------|-------|-------|
| CM_L1_1 | 7.08G  | 5.89G  | 0.03 | 97.91 | 93.73 |
| CM_L1_2 | 7.03G  | 5.98G  | 0.03 | 98.03 | 93.95 |
| CM_L1_3 | 10.29G | 9.23G  | 0.03 | 97.97 | 93.92 |
| CM_L2_1 | 6.45G  | 6.07G  | 0.03 | 97.46 | 92.77 |
| CM_L2_2 | 13.99G | 11.76G | 0.03 | 97.29 | 92.50 |
| CM_L2_3 | 7.58G  | 6.16G  | 0.03 | 97.95 | 93.77 |
| CX_CK01 | 7.03G  | 5.88G  | 0.03 | 97.93 | 93.74 |
| CX_CK01 | 7.54G  | 6.28G  | 0.03 | 97.96 | 93.88 |
| CX_CK01 | 7.82G  | 6.72G  | 0.03 | 97.95 | 93.86 |
| CX_L1_1 | 7.02G  | 5.89G  | 0.03 | 97.96 | 93.87 |
| CX_L1_2 | 7.39G  | 6.31G  | 0.03 | 97.82 | 93.51 |
| CX_L1_3 | 7.43G  | 6.42G  | 0.03 | 97.91 | 93.74 |
| CX_L2_1 | 6.9G   | 5.97G  | 0.02 | 98.10 | 94.26 |
| CX_L2_2 | 8.1G   | 6.78G  | 0.03 | 97.97 | 93.91 |
| CX_L2_3 | 6.79G  | 5.92G  | 0.03 | 98.04 | 94.04 |

**Table S3.** Correlation matrix of RNA-seq samples.

| Sample      | CM_CK | CM_CK | CM_CK | CM_L1 | CM_L1 | CM_L1 | CM_L2 | CM_L2 | CM_L2 | CX_CK | CX_CK | CX_CK | CX_L1 | CX_L1 | CX_L1 | CX_L2 | CX_L2 | CX_L2 |       |
|-------------|-------|-------|-------|-------|-------|-------|-------|-------|-------|-------|-------|-------|-------|-------|-------|-------|-------|-------|-------|
|             | 01    | 02    | 03    | _1    | _2    | _3    | _1    | _2    | _3    | 01    | 02    | 03    | _1    | _2    | _3    | _1    | _2    | _3    |       |
| CM_CK<br>01 |       | 1     | 0.994 | 0.994 | 0.819 | 0.825 | 0.861 | 0.863 | 0.864 | 0.861 | 0.94  | 0.941 | 0.945 | 0.815 | 0.817 | 0.811 | 0.754 | 0.755 | 0.757 |
| CM_CK       | 0.994 |       | 1     | 0.994 | 0.819 | 0.825 | 0.861 | 0.862 | 0.863 | 0.862 | 0.939 | 0.941 | 0.944 | 0.815 | 0.817 | 0.811 | 0.755 | 0.756 | 0.757 |

02

CM\_CK  
03

|       |       |   |       |       |      |       |       |       |       |       |       |       |       |       |       |       |       |
|-------|-------|---|-------|-------|------|-------|-------|-------|-------|-------|-------|-------|-------|-------|-------|-------|-------|
| 0.994 | 0.994 | 1 | 0.819 | 0.824 | 0.86 | 0.862 | 0.863 | 0.861 | 0.941 | 0.943 | 0.945 | 0.815 | 0.817 | 0.811 | 0.754 | 0.755 | 0.756 |
|-------|-------|---|-------|-------|------|-------|-------|-------|-------|-------|-------|-------|-------|-------|-------|-------|-------|

CM\_L1  
\_1

|       |       |       |   |      |       |       |       |       |      |       |       |       |       |       |       |       |       |
|-------|-------|-------|---|------|-------|-------|-------|-------|------|-------|-------|-------|-------|-------|-------|-------|-------|
| 0.819 | 0.819 | 0.819 | 1 | 0.99 | 0.961 | 0.897 | 0.904 | 0.906 | 0.85 | 0.856 | 0.863 | 0.869 | 0.872 | 0.879 | 0.904 | 0.905 | 0.901 |
|-------|-------|-------|---|------|-------|-------|-------|-------|------|-------|-------|-------|-------|-------|-------|-------|-------|

CM\_L1  
\_2

|       |       |       |      |   |       |       |       |       |       |       |      |       |       |       |       |       |       |
|-------|-------|-------|------|---|-------|-------|-------|-------|-------|-------|------|-------|-------|-------|-------|-------|-------|
| 0.825 | 0.825 | 0.824 | 0.99 | 1 | 0.968 | 0.904 | 0.909 | 0.908 | 0.862 | 0.865 | 0.87 | 0.876 | 0.879 | 0.878 | 0.908 | 0.908 | 0.907 |
|-------|-------|-------|------|---|-------|-------|-------|-------|-------|-------|------|-------|-------|-------|-------|-------|-------|

CM\_L1  
\_3

|       |       |      |       |       |   |      |       |       |       |       |       |       |       |       |       |       |       |
|-------|-------|------|-------|-------|---|------|-------|-------|-------|-------|-------|-------|-------|-------|-------|-------|-------|
| 0.861 | 0.861 | 0.86 | 0.961 | 0.968 | 1 | 0.97 | 0.971 | 0.969 | 0.889 | 0.891 | 0.893 | 0.923 | 0.924 | 0.918 | 0.912 | 0.912 | 0.914 |
|-------|-------|------|-------|-------|---|------|-------|-------|-------|-------|-------|-------|-------|-------|-------|-------|-------|

CM\_L2  
\_1

|       |       |       |       |       |      |   |       |       |       |       |      |       |      |       |       |       |       |
|-------|-------|-------|-------|-------|------|---|-------|-------|-------|-------|------|-------|------|-------|-------|-------|-------|
| 0.863 | 0.862 | 0.862 | 0.897 | 0.904 | 0.97 | 1 | 0.994 | 0.991 | 0.877 | 0.879 | 0.88 | 0.929 | 0.93 | 0.925 | 0.879 | 0.879 | 0.881 |
|-------|-------|-------|-------|-------|------|---|-------|-------|-------|-------|------|-------|------|-------|-------|-------|-------|

CM\_L2  
\_2

|       |       |       |       |       |       |       |   |       |       |       |       |      |       |       |       |       |       |
|-------|-------|-------|-------|-------|-------|-------|---|-------|-------|-------|-------|------|-------|-------|-------|-------|-------|
| 0.864 | 0.863 | 0.863 | 0.904 | 0.909 | 0.971 | 0.994 | 1 | 0.995 | 0.876 | 0.878 | 0.882 | 0.93 | 0.931 | 0.929 | 0.884 | 0.884 | 0.885 |
|-------|-------|-------|-------|-------|-------|-------|---|-------|-------|-------|-------|------|-------|-------|-------|-------|-------|

CM\_L2  
\_3

|       |       |       |       |       |       |       |       |   |       |       |       |       |       |       |       |       |       |
|-------|-------|-------|-------|-------|-------|-------|-------|---|-------|-------|-------|-------|-------|-------|-------|-------|-------|
| 0.861 | 0.862 | 0.861 | 0.906 | 0.908 | 0.969 | 0.991 | 0.995 | 1 | 0.872 | 0.875 | 0.879 | 0.927 | 0.929 | 0.929 | 0.882 | 0.883 | 0.882 |
|-------|-------|-------|-------|-------|-------|-------|-------|---|-------|-------|-------|-------|-------|-------|-------|-------|-------|

CX\_CK  
01

|      |       |       |      |       |       |       |       |       |   |       |      |       |       |       |       |       |      |
|------|-------|-------|------|-------|-------|-------|-------|-------|---|-------|------|-------|-------|-------|-------|-------|------|
| 0.94 | 0.939 | 0.941 | 0.85 | 0.862 | 0.889 | 0.877 | 0.876 | 0.872 | 1 | 0.994 | 0.99 | 0.806 | 0.807 | 0.795 | 0.786 | 0.787 | 0.79 |
|------|-------|-------|------|-------|-------|-------|-------|-------|---|-------|------|-------|-------|-------|-------|-------|------|

CX\_CK  
02

|       |       |       |       |       |       |       |       |       |       |   |       |       |       |       |       |      |       |
|-------|-------|-------|-------|-------|-------|-------|-------|-------|-------|---|-------|-------|-------|-------|-------|------|-------|
| 0.941 | 0.941 | 0.943 | 0.856 | 0.865 | 0.891 | 0.879 | 0.878 | 0.875 | 0.994 | 1 | 0.991 | 0.808 | 0.808 | 0.798 | 0.789 | 0.79 | 0.791 |
|-------|-------|-------|-------|-------|-------|-------|-------|-------|-------|---|-------|-------|-------|-------|-------|------|-------|

CX\_CK  
03

|       |       |       |       |      |       |      |       |       |      |       |   |       |      |       |       |       |       |
|-------|-------|-------|-------|------|-------|------|-------|-------|------|-------|---|-------|------|-------|-------|-------|-------|
| 0.945 | 0.944 | 0.945 | 0.863 | 0.87 | 0.893 | 0.88 | 0.882 | 0.879 | 0.99 | 0.991 | 1 | 0.809 | 0.81 | 0.805 | 0.794 | 0.795 | 0.796 |
|-------|-------|-------|-------|------|-------|------|-------|-------|------|-------|---|-------|------|-------|-------|-------|-------|

CX\_L1  
\_1

|       |       |       |       |       |       |       |      |       |       |       |       |   |       |       |     |     |       |
|-------|-------|-------|-------|-------|-------|-------|------|-------|-------|-------|-------|---|-------|-------|-----|-----|-------|
| 0.815 | 0.815 | 0.815 | 0.869 | 0.876 | 0.923 | 0.929 | 0.93 | 0.927 | 0.806 | 0.808 | 0.809 | 1 | 0.993 | 0.986 | 0.9 | 0.9 | 0.902 |
|-------|-------|-------|-------|-------|-------|-------|------|-------|-------|-------|-------|---|-------|-------|-----|-----|-------|

CX\_L1  
\_2

|       |       |       |       |       |       |      |       |       |       |       |      |       |   |       |       |       |       |
|-------|-------|-------|-------|-------|-------|------|-------|-------|-------|-------|------|-------|---|-------|-------|-------|-------|
| 0.817 | 0.817 | 0.817 | 0.872 | 0.879 | 0.924 | 0.93 | 0.931 | 0.929 | 0.807 | 0.808 | 0.81 | 0.993 | 1 | 0.988 | 0.901 | 0.902 | 0.903 |
|-------|-------|-------|-------|-------|-------|------|-------|-------|-------|-------|------|-------|---|-------|-------|-------|-------|

|         |       |       |       |       |       |       |       |       |       |       |       |       |       |       |       |       |       |       |
|---------|-------|-------|-------|-------|-------|-------|-------|-------|-------|-------|-------|-------|-------|-------|-------|-------|-------|-------|
| CX_L1_3 | 0.811 | 0.811 | 0.811 | 0.879 | 0.878 | 0.918 | 0.925 | 0.929 | 0.929 | 0.795 | 0.798 | 0.805 | 0.986 | 0.988 | 1     | 0.901 | 0.902 | 0.9   |
| CX_L2_1 | 0.754 | 0.755 | 0.754 | 0.904 | 0.908 | 0.912 | 0.879 | 0.884 | 0.882 | 0.786 | 0.789 | 0.794 | 0.9   | 0.901 | 0.901 | 1     | 0.994 | 0.993 |
| CX_L2_2 | 0.755 | 0.756 | 0.755 | 0.905 | 0.908 | 0.912 | 0.879 | 0.884 | 0.883 | 0.787 | 0.79  | 0.795 | 0.9   | 0.902 | 0.902 | 0.994 | 1     | 0.993 |
| CX_L2_3 | 0.757 | 0.757 | 0.756 | 0.901 | 0.907 | 0.914 | 0.881 | 0.885 | 0.882 | 0.79  | 0.791 | 0.796 | 0.902 | 0.903 | 0.9   | 0.993 | 0.993 | 1     |

---

**Table S4.** List of names and IDs of genes involved in ethylene and ABA biosynthesis and signaling, lipid metabolism. The abbreviations used are listed in the legend to Fig. 3.

|          | Sample                  | CM_CK0      | CM_L1       | CM_L2       | CX_CK0      | CX_L1       | CX_L2       |
|----------|-------------------------|-------------|-------------|-------------|-------------|-------------|-------------|
| Ethylene | Prupe.1G034300 ETR      | 17.61055658 | 112.3402637 | 127.4228872 | 33.15224792 | 74.31544703 | 182.9672569 |
|          | Prupe.7G254900 CTR1     | 8.943620495 | 6.399910964 | 11.68846564 | 9.436605371 | 3.561679619 | 4.793696263 |
|          | Prupe.7G117700 CTR1     | 9.778313373 | 12.18927085 | 20.15137746 | 13.97316972 | 19.06586873 | 24.86293016 |
|          | Prupe.6G235600 EIN2     | 60.53339978 | 38.34609981 | 66.1455199  | 41.31351843 | 57.89960713 | 29.47634763 |
|          | Prupe.7G244300 EBF1     | 8.125526651 | 18.91585491 | 42.49044703 | 10.10430316 | 40.09389863 | 48.15697243 |
|          | Prupe.1G480700 EBF      | 52.13443035 | 45.96194992 | 101.7419015 | 83.5253074  | 74.95320044 | 102.1319139 |
|          | Prupe.1G107000 SAM1     | 1425.012297 | 2818.913931 | 1670.150785 | 1576.065365 | 1622.878833 | 2781.648657 |
|          | Prupe.2G176900 ACS1     | 92.73336001 | 262.5432466 | 577.9011357 | 150.2282406 | 410.5892546 | 1891.585457 |
|          | Prupe.5G083500 ACS2     | 3.574899782 | 11.66545147 | 18.24605937 | 5.404841197 | 8.92815028  | 6.665613501 |
|          | Prupe.3G209900 ACO1     | 3580.110469 | 22323.05886 | 18935.71298 | 10279.38723 | 14159.01408 | 30567.95912 |
|          | Prupe.4G013800 ACO2     | 26.25556246 | 5.701482667 | 19.58441932 | 3.780487888 | 66.69378716 | 145.9510381 |
| ABA      | Prupe.7G133100 ZEP      | 461.2284828 | 597.0990826 | 684.3769574 | 184.5947431 | 1833.625172 | 449.3352452 |
|          | Prupe.6G154100 ZEP      | 10.82033    | 1.731277315 | 3.962552864 | 14.40037322 | 1.128231982 | 0.267731707 |
|          | Prupe.4G082000<br>NCED3 | 23.56190926 | 304.4085517 | 1047.663118 | 129.3110318 | 357.5750975 | 216.3042515 |
|          | Prupe.4G150100<br>NCED2 | 2787.317951 | 1106.302223 | 3624.508861 | 2592.495543 | 1512.191043 | 576.8497661 |
|          | Sample                  | CM_CK0      | CM_L1       | CM_L2       | CX_CK0      | CX_L1       | CX_L2       |

|       |                           |             |                 |             |             |             |             |
|-------|---------------------------|-------------|-----------------|-------------|-------------|-------------|-------------|
| ABA   | Prupe.2G029900 ABA2       | 18.82872757 | 12.224371       | 5.355887192 | 23.98803774 | 6.830283201 | 9.756307875 |
|       | Prupe.6G150900 AAO3       | 11.09910745 | 2.1859919<br>21 | 4.238392581 | 8.498545903 | 4.350667868 | 2.167447964 |
|       | Prupe.7G051800 BG         | 0           | 0.0570408       | 0.259734807 | 0           | 4.099213903 | 23.16698763 |
|       | Prupe.7G267900 UGT        | 1332.726701 | 2020.729769     | 1876.255514 | 679.9141341 | 2883.073982 | 1243.011285 |
|       | Prupe.5G013100<br>CYP707A | 0.018127565 | 1.56414632      | 0.523328437 | 0.733758353 | 1.7776714   | 22.48157823 |
|       | Prupe.1G413500<br>PYL/PYR | 139.3504487 | 81.5618451      | 35.31965007 | 132.6589839 | 214.6025973 | 54.64570541 |
|       | Prupe.6G284000<br>PYL/PYR | 157.1548208 | 391.057638      | 87.26424581 | 139.4162555 | 30.99051298 | 146.1010791 |
|       | Prupe.7G204800<br>PYL/PYR | 243.2953517 | 168.3214592     | 746.8861846 | 207.0675733 | 471.4591622 | 183.6790531 |
|       | Prupe.2G239700 PP2C       | 261.8836167 | 289.6044474     | 730.8857143 | 176.0815911 | 824.2263197 | 387.8008546 |
|       | Prupe.5G054500 SnRK2      | 101.9096429 | 171.9580103     | 370.7242878 | 104.2480168 | 280.6235295 | 195.8611338 |
| Lipid | Prupe.8G041800 CK         | 18.07394893 | 79.40128877     | 35.66904066 | 86.68853143 | 25.55906634 | 50.20138487 |
|       | Prupe.5G233000 PMT        | 11.88996516 | 0.739594224     | 2.811955774 | 5.52606567  | 1.943416838 | 1.622881735 |
|       | Prupe.7G262100 AAPT       | 37.48398794 | 46.10544441     | 72.40727782 | 37.31996456 | 164.7124058 | 46.12735442 |
|       | Prupe.3G228600 DGK        | 12.39024855 | 24.08739152     | 11.81574551 | 20.9116645  | 10.76975727 | 36.12334715 |
|       | Prupe.1G317400 PAP        | 45.14666773 | 3.297032827     | 4.139631203 | 12.48145049 | 83.34268427 | 101.3817589 |

|       | Sample                   | CM_CK0      | CM_L1           | CM_L2       | CX_CK0      | CX_L1       | CX_L2       |
|-------|--------------------------|-------------|-----------------|-------------|-------------|-------------|-------------|
| Lipid | Prupe.1G319700 PSS       | 15.22872014 | 6.048495202     | 7.605324528 | 3.895729952 | 22.35935953 | 9.567023379 |
|       | Prupe.4G011700 CDS       | 14.69829409 | 12.754630<br>92 | 17.17576219 | 14.54615167 | 23.26011015 | 17.01828055 |
|       | Prupe.6G325200 LACS      | 9.545025834 | 9.652592863     | 10.82955535 | 24.79695194 | 7.078295383 | 6.14308022  |
|       | Prupe.2G098700 PLC       | 7.826068397 | 59.48045181     | 68.66648564 | 8.510372969 | 133.160452  | 211.7426126 |
|       | Prupe.6G058400 PLC       | 36.20930494 | 47.88609371     | 61.37298373 | 37.58377317 | 84.02754356 | 77.67902364 |
|       | Prupe.2G250000 PLC       | 21.52050613 | 19.95460922     | 49.54659556 | 30.11070003 | 57.31326162 | 21.67794216 |
|       | Prupe.2G250100 PLC       | 49.31598494 | 47.34748958     | 46.92820319 | 40.73668606 | 85.69910138 | 53.06359773 |
|       | Prupe.6G056900 PLC       | 9.986569066 | 11.46299729     | 17.66751367 | 12.61591304 | 21.95484682 | 16.04491942 |
|       | Prupe.3G084800 PLDα      | 373.6323758 | 77.11037615     | 130.8848406 | 283.6904719 | 113.2969335 | 62.85047423 |
|       | Prupe.1G130000 PLDζ      | 12.30271773 | 12.36913803     | 17.28731255 | 11.14653405 | 20.572862   | 12.63907718 |
|       | Prupe.4G259400 FAD       | 3.574358455 | 16.86240422     | 2.183374316 | 4.047676762 | 3.59935588  | 6.178756365 |
|       | Prupe.6G056100 FAD       | 0.173637343 | 321.2727487     | 98.8387297  | 7.334752792 | 166.3958413 | 435.5096503 |
|       | Prupe.6G278800 FAD       | 25.14539753 | 11.45328865     | 6.425438548 | 38.35079963 | 4.325625108 | 11.7591029  |
| FA    | Prupe.4G082200 PDH       | 47.64556456 | 46.91621221     | 15.37260596 | 64.97160716 | 17.43319359 | 42.7389643  |
|       | Prupe.1G512000<br>ACCase | 42.4466727  | 58.67288955     | 24.93310197 | 18.55755129 | 45.23580936 | 26.22652871 |



|    | Sample             | CM_CK0      | CM_L1           | CM_L2       | CX_CK0      | CX_L1       | CX_L2       |
|----|--------------------|-------------|-----------------|-------------|-------------|-------------|-------------|
| FA | Prupe.4G015900 MCD | 14.38861553 | 6.058510466     | 4.949429415 | 6.592078875 | 3.357416946 | 2.459237762 |
|    | Prupe.5G154900 KAR | 25.71565527 | 26.612104<br>39 | 15.6890292  | 40.89238502 | 9.378781081 | 24.82750312 |
|    | Prupe.6G365200 SAD | 84.41168235 | 41.69365618     | 30.17323222 | 85.4466629  | 15.61391601 | 44.32453025 |
|    | Prupe.7G221100 ENR | 1607.390966 | 429.2204113     | 651.0712911 | 922.2554044 | 770.4389618 | 375.295089  |
|    | Prupe.6G015200 ENR | 19.19026802 | 10.83028997     | 6.763071489 | 25.41237247 | 3.333196107 | 4.332844036 |

**Table S5.** List of genes in the co-expression network of Fig. S9A and B.

| Gene ID in Fig. S9A | Label in Fig. S9A | Gene ID in Fig. S9B | Label in Fig. S9B |
|---------------------|-------------------|---------------------|-------------------|
| Prupe.1G478400      | bZIP              | Prupe.1G455300      | bZIP              |
| Prupe.2G098700      | PLC               | Prupe.2G182800      | bZIP              |
| Prupe.2G176900      | ACS1              | Prupe.2G202500      | NAC               |
| Prupe.3G098100      | WRKY              | Prupe.2G202600      | NAC               |
| Prupe.3G209900      | ACO1              | Prupe.2G202700      | NAC               |
| Prupe.3G228600      | DGK               | Prupe.3G269500      | bHLH              |
| Prupe.4G013800      | ACO2              | Prupe.4G077100      | bHLH              |
| Prupe.4G055500      | ERF               | Prupe.4G082000      | NCED2             |
| Prupe.5G013100      | CYP707A           | Prupe.5G040400      | NAC               |
| Prupe.5G061800      | ERF               | Prupe.6G303500      | bHLH              |
| Prupe.5G117800      | ERF               | Prupe.7G094500      | DGD               |
| Prupe.6G056100      | FAD               | Prupe.7G114400      | bZIP              |
| Prupe.7G051800      | DGK               |                     |                   |
| Prupe.8G126600      | bZIP              |                     |                   |
| Prupe.5G054500      | SnRK2             |                     |                   |

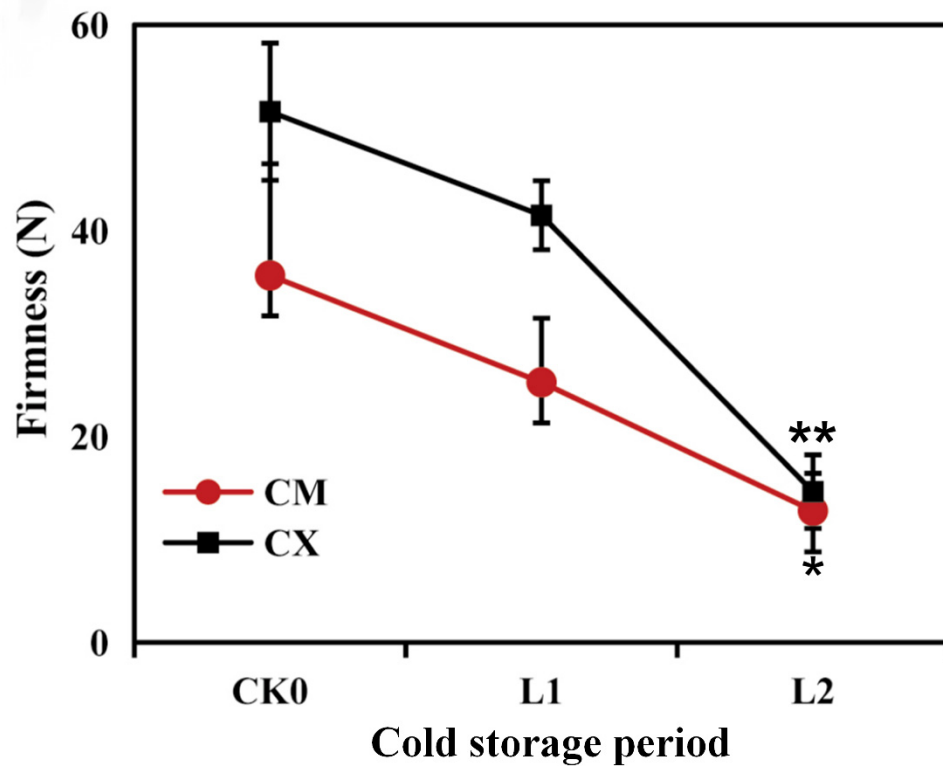

Fig. S1. Changes of firmness of CX and CM fruits during low temperature storage

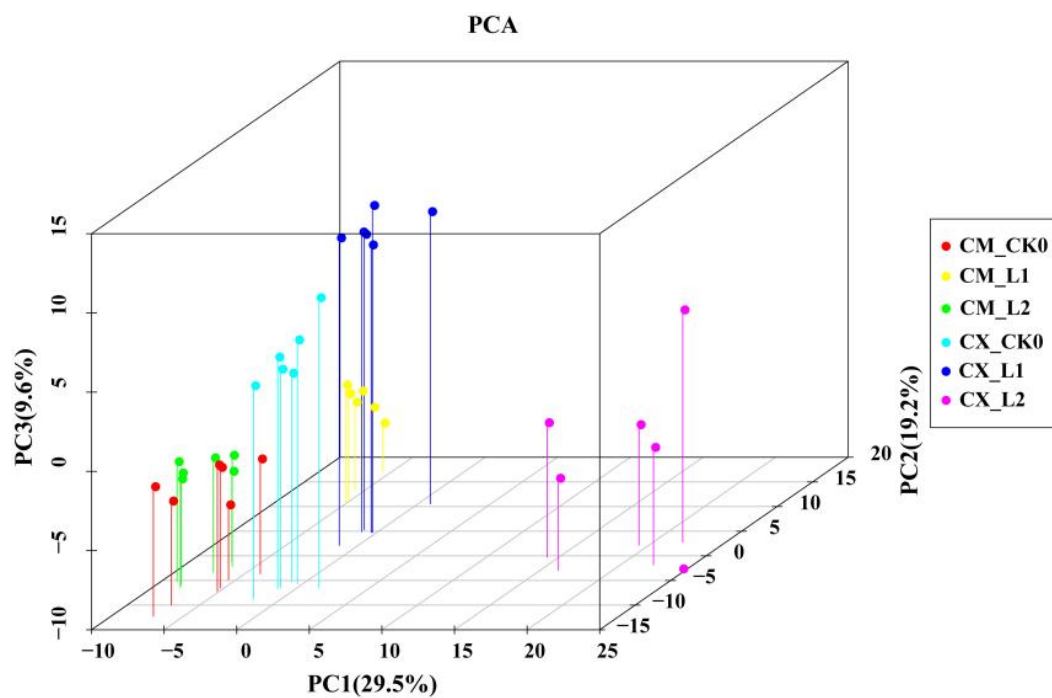

Fig. S2. Principal component analysis (PCA) of the lipidome data in 'CM' and 'CX' peaches stored at low temperature.

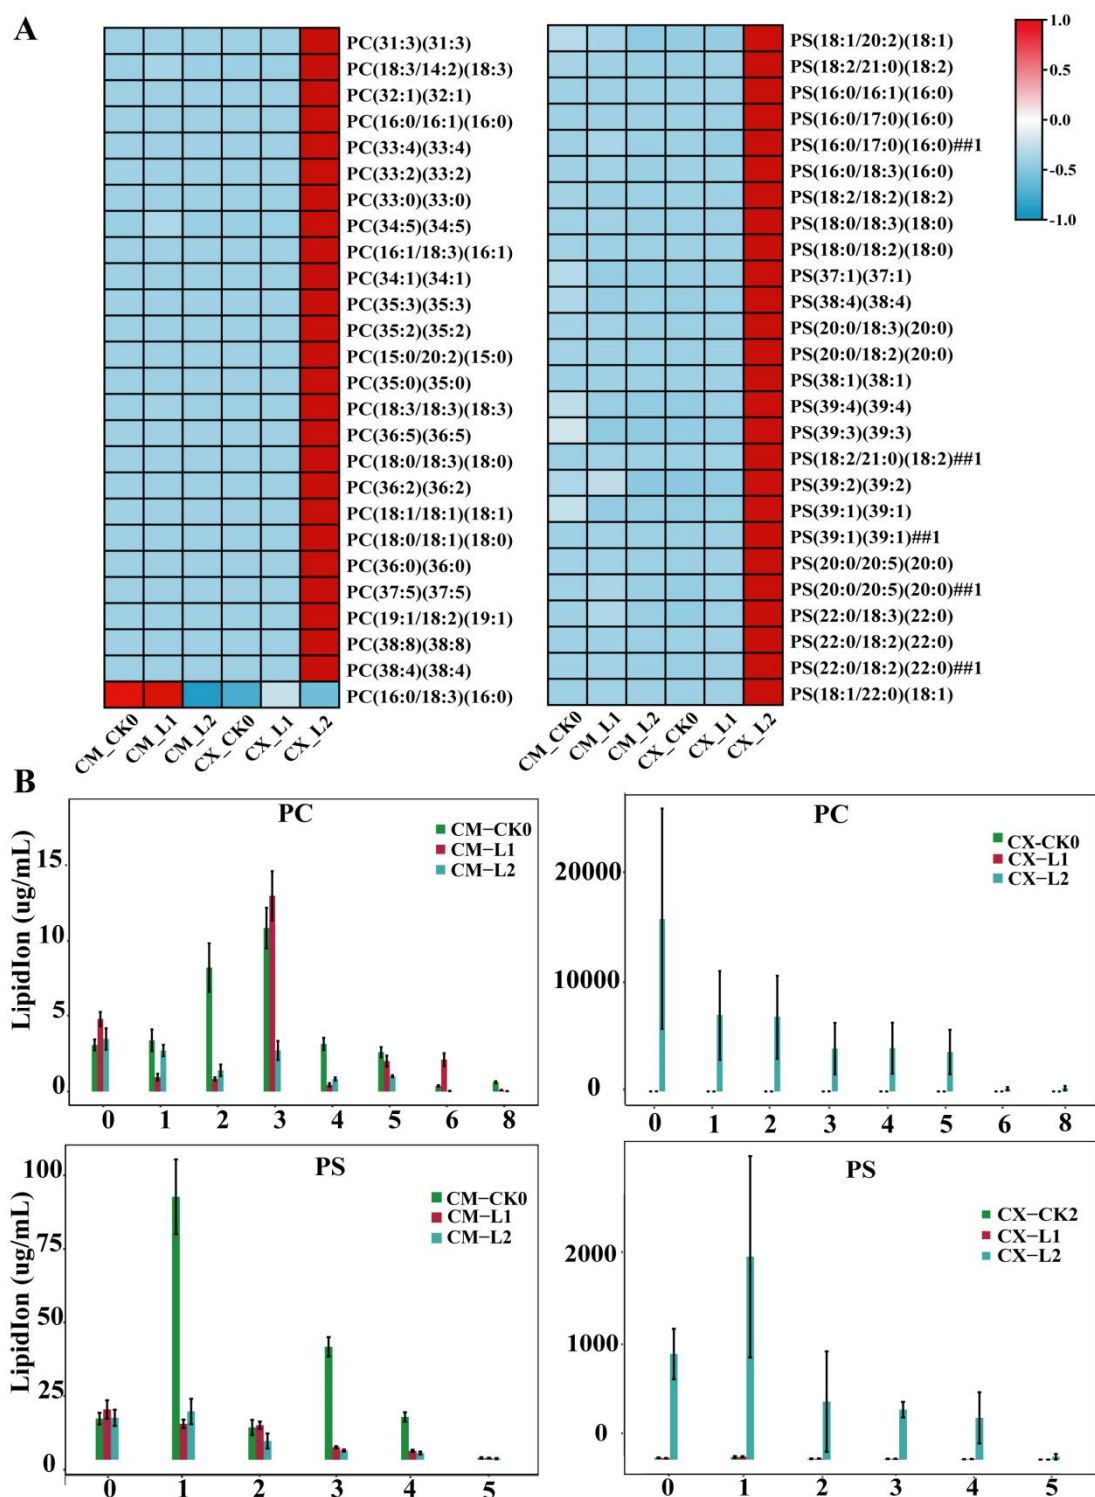

**Fig. S3.** Lipid type and saturation analysis of 'CM' and 'CX' peaches stored at low temperature. (A) Changes in mainly lipid types; (B) Changes in lipid saturation of PC and PS. Blue, white, and red colors indicate low, medium, and high contents, respectively. The error bars represent the standard error (SE) calculated according to six independent biological replicates.

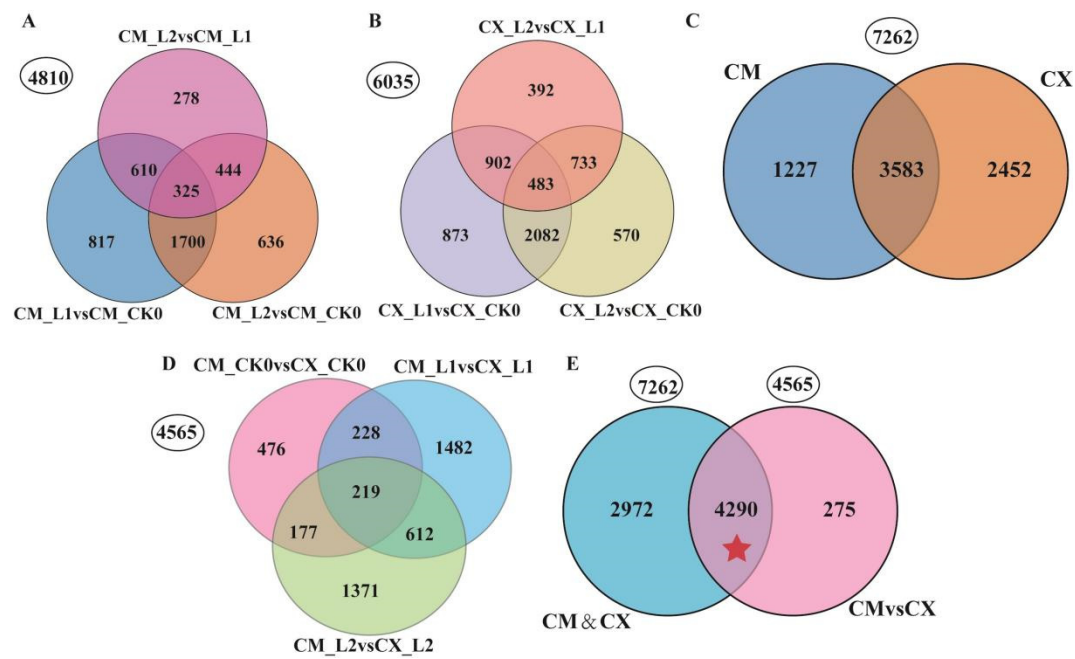

**Fig. S4.** Venn diagrams of DEGs among the different comparison groups. (A) CM responds to low temperature differential genes; (B) Spring snow responds to low temperature differential genes; (C) Spring beauty and spring beauty responds to low temperature differential genes Veen; (D) Different genes in each period of the two varieties.

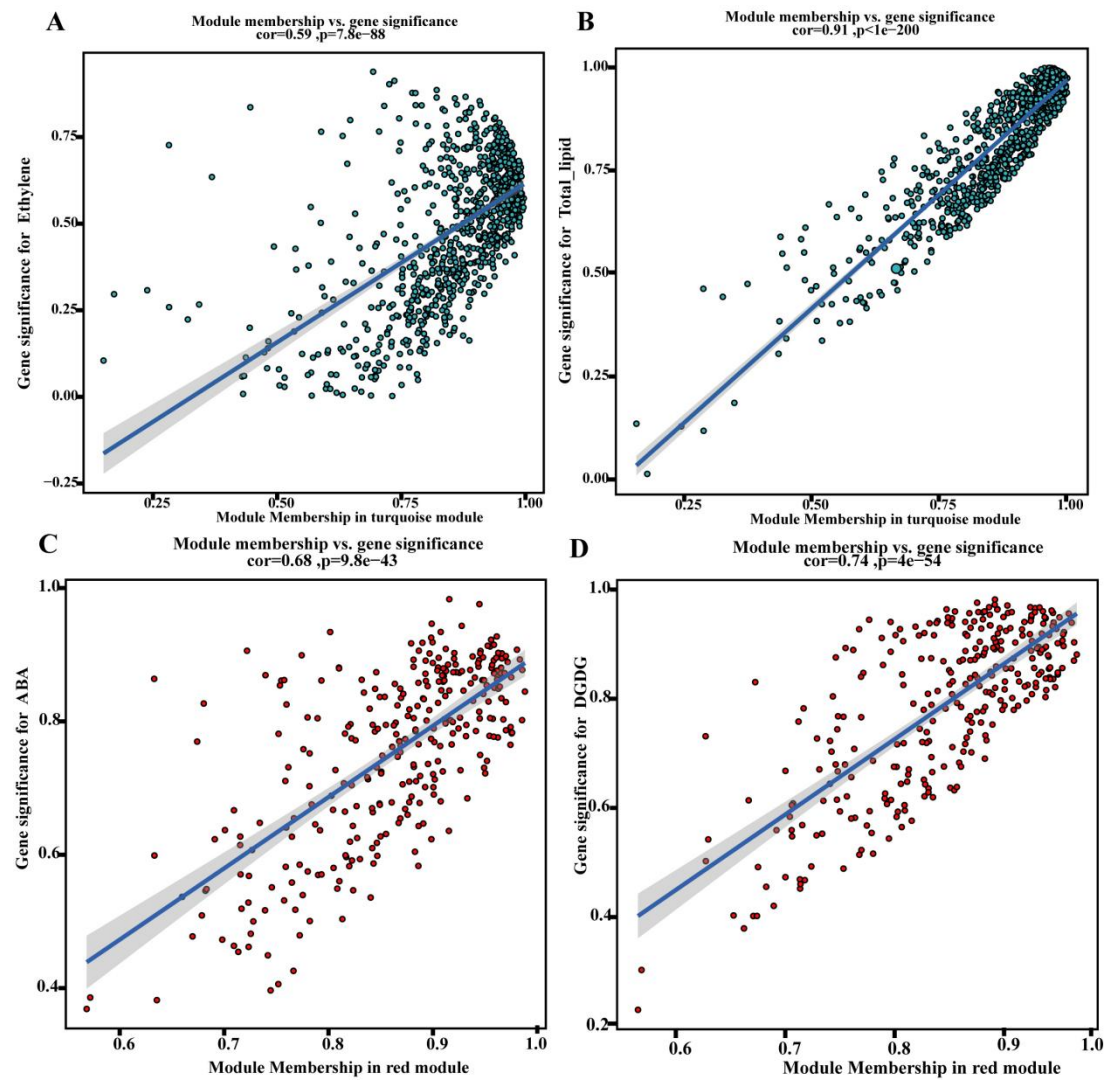

**Fig. S5.** The gene significance (GS) for ethylene (y-axis), total lipid(y-axis), ABA(y-axis) and DGDG (y-axis) vs. the module membership (x-axis) in modules turquoise and red. (A-B) Gene significance (GS) for ethylene and total lipid vs. module membership in module turquoise. (C-D) Gene significance (GS) for ABA and DGDG vs. module membership in module red. Module membership (KME) is the module eigengene-based network connectivity.

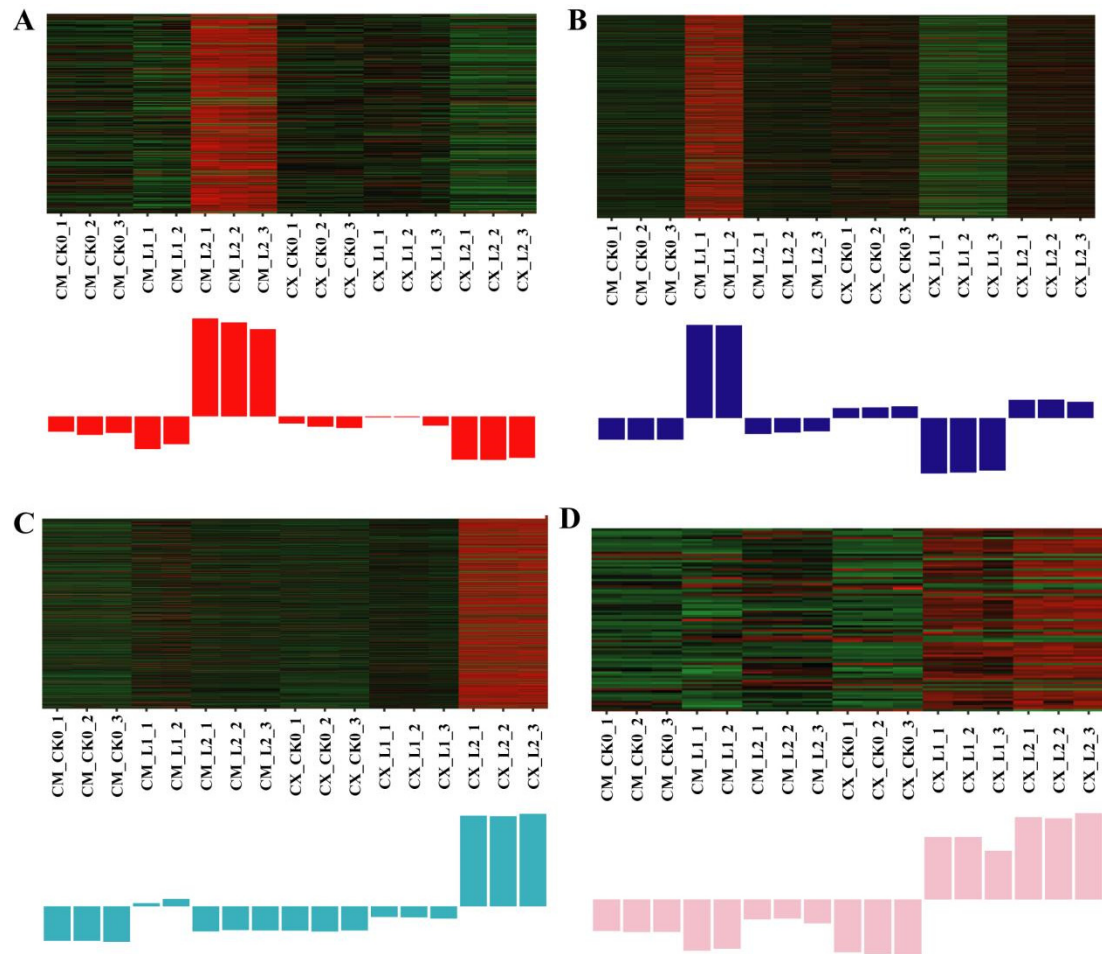

**Fig. S6.** Expression heatmaps and profiles of DEGs and eigengenes in modules red, blue, turquoise and pink in response to cold storage in 'CM' and 'CX'. Red indicates upregulated genes, and green indicates downregulated genes. The bar graph of eigengene expression shows the eigengene value variance calculated from the singular value composition for each module.

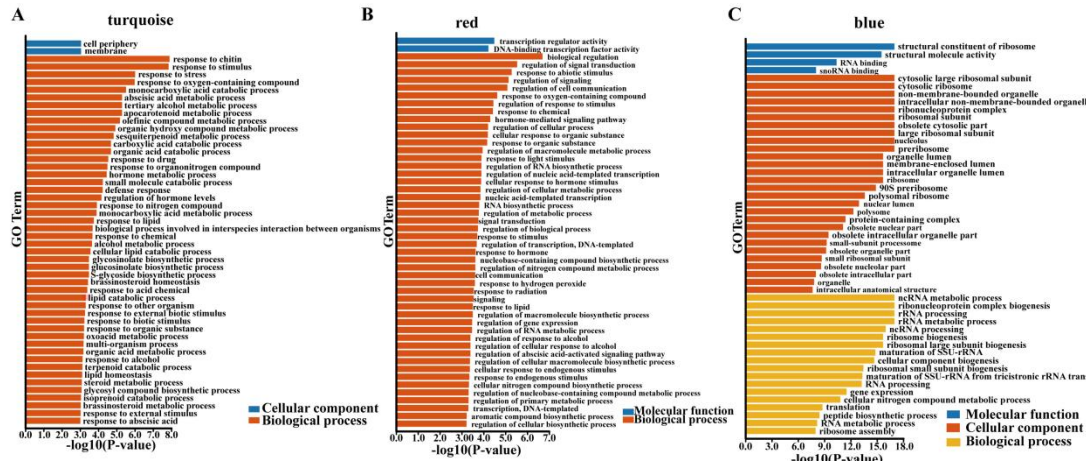

Fig. S7. GO enrichment analysis of DEGs in turquoise (A), red (B) and blue (C).



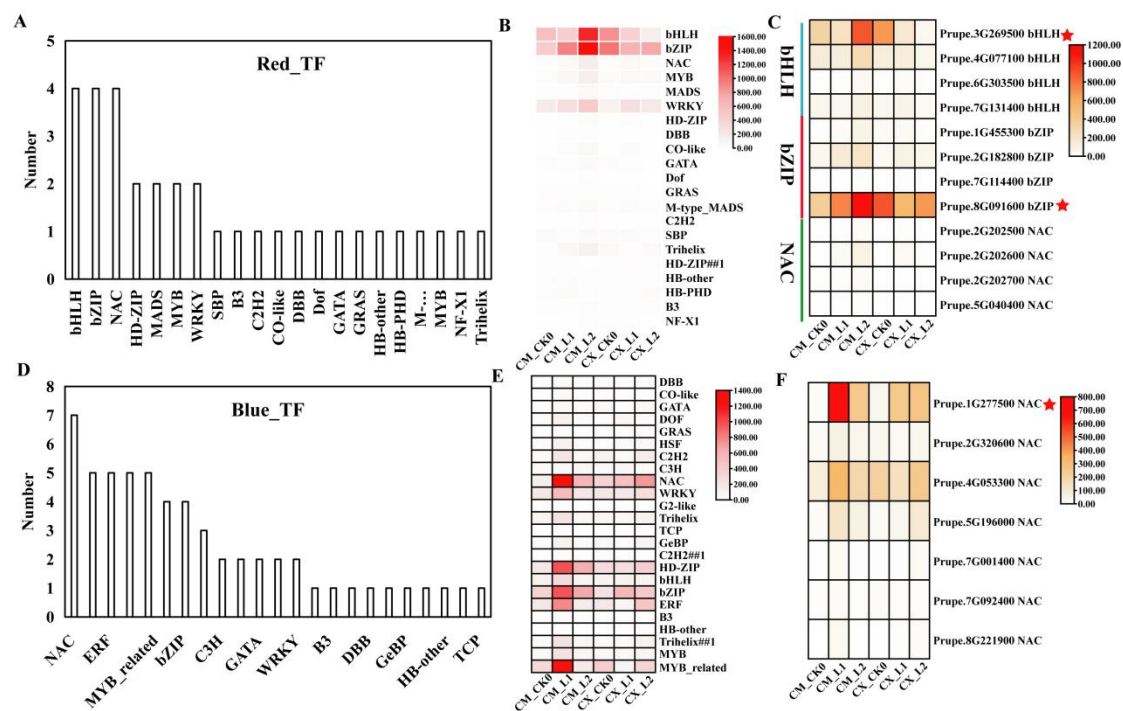

**Fig. S8.** Transcription factors and correlation between diffierentially TFs family and ABA, ethylene and lipid in red and blue modules.

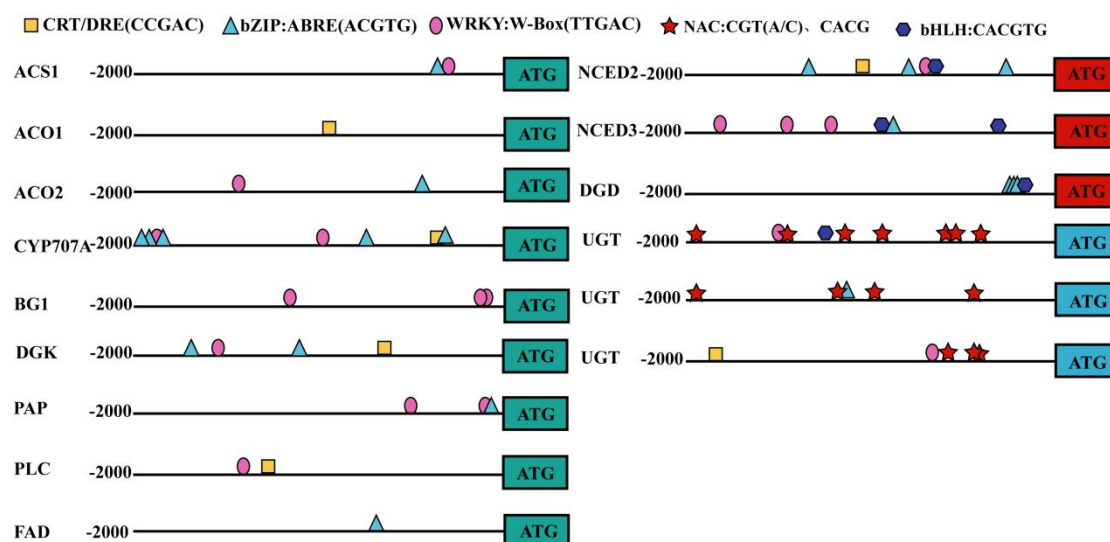

**Fig. S9.** Prediction of the cis-acting elements in the 2000-bp *ACS1*, *ACO1*, *ACO2*, *CYP707A*, *BG1*, *DGK*, *PAP*, *PLC*, *FAD*, *NCED2*, *NCED3*, *DGD* and *UGT* promoter region was performed by searching the PLACE databases.

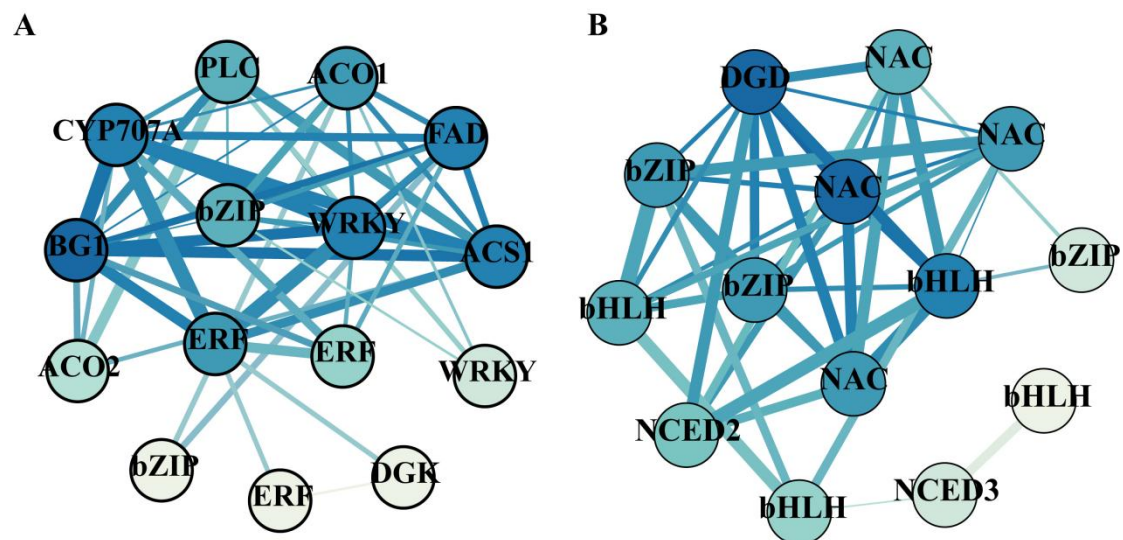

**Fig. S10.** Transcription factor and structural gene co-expression regulatory network. (A) Turquoise module differential TF and structural gene co-expression regulatory network; (B) Red module differential TF and structural gene co-expression regulatory network.
